# Supplementary material
Source: PubMed Central journal article supplement (PMC4580515)
Supplement: NIHMS709191-supplement-Supplemental_Material.pdf [file NIHMS709191-supplement-Supplemental_Material.pdf]

**SUPPLEMENTAL MATERIAL**

**Supplemental Tables**

|                                               | <b>Baseline before administration</b> | <b>7 days after administration</b> | <b>P value</b> |
|-----------------------------------------------|---------------------------------------|------------------------------------|----------------|
| Plasma prothrombin time (s)                   | 11.1 ± 0.3                            | 15.6 ± 4.5                         | 0.347          |
| Activated partial thromboplastin time (s)     | 25.0 ± 0.9                            | 25.6 ± 1.2                         | 0.535          |
| Fibrinogen (g/L)                              | 2.8 ± 0.2                             | 3.3 ± 0.2                          | 0.191          |
| Alanine aminotransferase (U/L)                | 32.8 ± 2.1                            | 33.4 ± 7.0                         | 0.574          |
| Aspartate aminotransferase (U/L)              | 29.7 ± 1.3                            | 29.3 ± 7.2                         | 0.429          |
| Total bilirubin (µmol/L)                      | 24.9 ± 3.5                            | 24.6 ± 3.8                         | 0.698          |
| Blood glucose (mmol/L)                        | 7.0 ± 0.7                             | 6.4 ± 0.7                          | 0.675          |
| Blood urea nitrogen (mmol/L)                  | 5.4 ± 0.4                             | 4.1 ± 0.2                          | 0.063          |
| Serum creatinine (µmol/L)                     | 88.1 ± 4.5                            | 74.5 ± 3.5                         | 0.067          |
| K <sup>+</sup> (mmol/L)                       | 4.0 ± 0.1                             | 3.9 ± 0.1                          | 0.236          |
| Na <sup>+</sup> (mmol/L)                      | 141.0 ± 0.5                           | 140.5 ± 0.7                        | 0.942          |
| Cl <sup>-</sup> (mmol/L)                      | 106.5 ± 0.8                           | 104.4 ± 1.0                        | 0.122          |
| White blood cell counts (x10 <sup>9</sup> /L) | 10.1 ± 1.3                            | 6.9 ± 0.5                          | 0.029          |
| Red blood cell counts (x10 <sup>9</sup> /L)   | 4.4 ± 0.1                             | 4.3 ± 0.2                          | 0.618          |
| Plate counts (x10 <sup>9</sup> /L)            | 216.2 ± 12.9                          | 217.1 ± 15.3                       | 0.962          |
| Neutrophil counts (x10 <sup>9</sup> /L)       | 7.0 ± 1.2                             | 5.0 ± 0.5                          | 0.066          |
| lymphocytes (x10 <sup>9</sup> /L)             | 2.4 ± 0.2                             | 1.2 ± 0.1                          | 0.012          |

Plus-minus values are means ± SE. Comparisons were performed with paired sample *t*-test.

---

***Supplementary Table 1. Laboratory data before and after fingolimod plus alteplase administration in patients with AIS***

## Supplemental Figures and Figure Legends

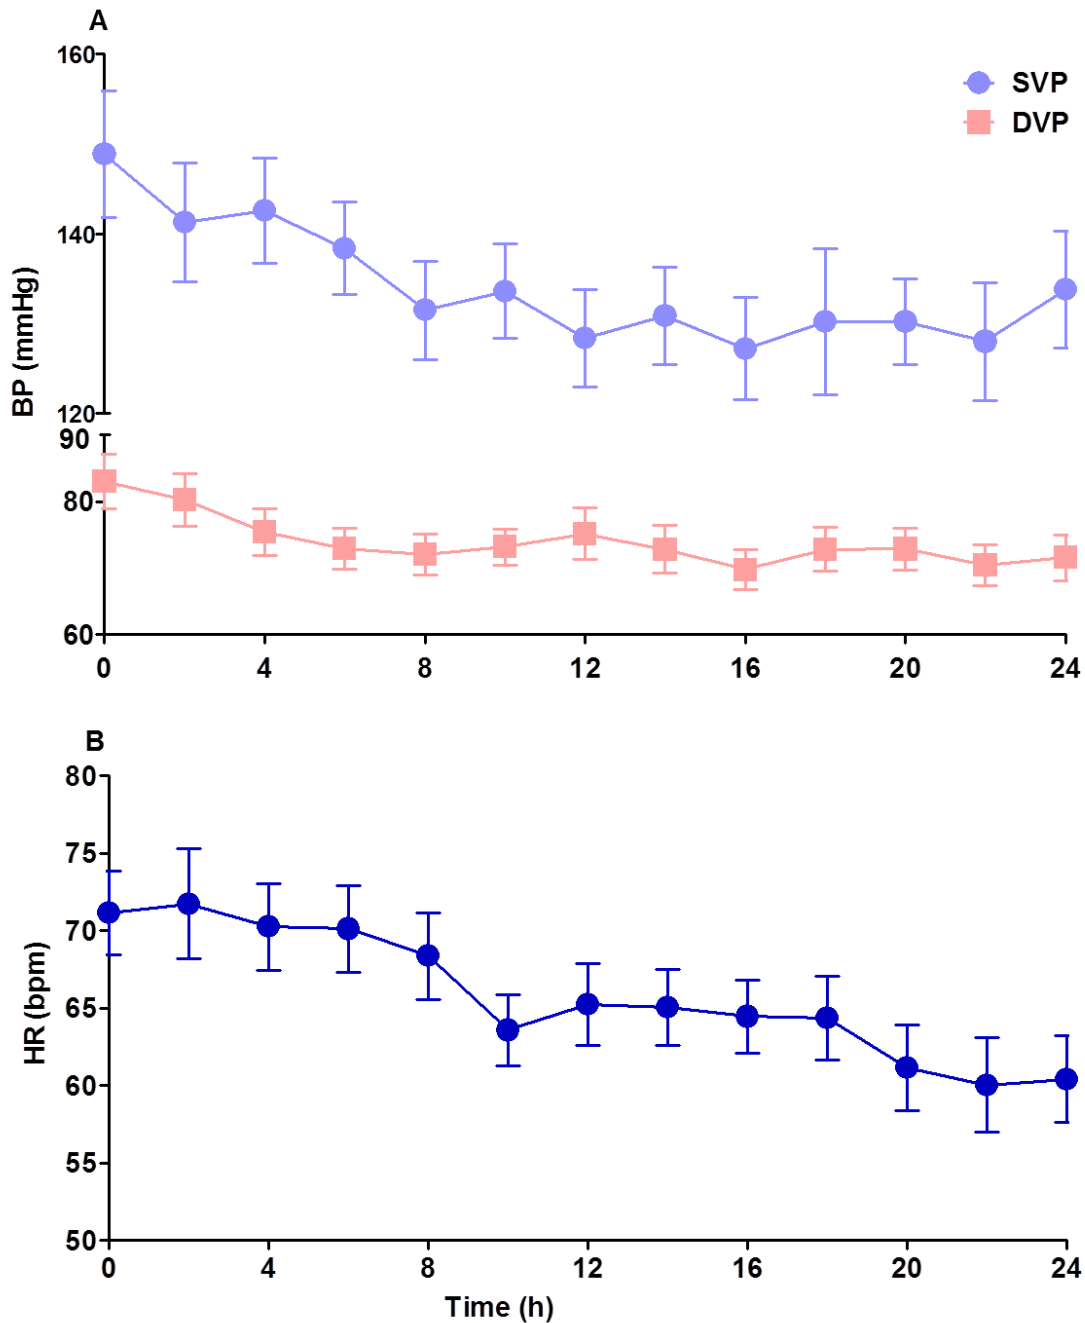

**Supplementary Figure 1.** Blood pressure and heart rate dynamic change during 24 hours after first dose of fingolimod plus alteplase. Blood pressure (BP) and heart rate (HR) were monitored during 24 hours after first dose. Upper curve stands for systolic blood pressure (SVP), and lower curve stands for diastolic blood pressure (DVP) on panel A. Heart rate temporal trajectories in groups after oral fingolimod on panel B. Values are mean  $\pm$  SE; comparisons were performed with the ANOVA.
